# Supplementary material for: Characterising Kenyan hospitals’ suitability for medical officer internship training: a secondary data analysis of a cross-sectional study
Source: HighWire-hosted journal article supplement (doi:10.1136/bmjopen-2021-056426), 2022-05-01
Supplement: bmjopen-2021-056426supp002_data_supplement.pdf [file bmjopen-2021-056426supp002_data_supplement.pdf]

## Additional file 2. Comparing internship hospitals sampled in KHHFA and others

|                | 61 KHHFA hospitals      | 12 other hospitals     |
|----------------|-------------------------|------------------------|
| Level          |                         |                        |
| - Level 4      | 44                      | 11                     |
| - Level 5      | 15                      | 1                      |
| - Level 6      | 2                       | 0                      |
| Ownership      |                         |                        |
| - MoH          | 54                      | 0                      |
| - Private      | 2                       | 4                      |
| - FBO          | 5                       | 8                      |
| Bed number     |                         |                        |
| - Mean (SD)    | 262.9 (213.4)           | 171.2 (71.0)           |
| - Median (IQR) | 200 (156, 276)          | 180 (106, 221)         |
| Total delivery |                         |                        |
| - Mean         | 4585.1 (2747.0)         | 1349.4 (945.7)         |
| - Median (IQR) | 3980.7 (2972.3, 5502.7) | 1150.4 (649.7, 1683.5) |
| Live births    |                         |                        |
| - Mean         | 4466.9 (2691.9)         | 1321.3 (927.8)         |
| - Median (IQR) | 3814.3 (2844, 5384.3)   | 1138.4 (626.5, 1630)   |
| C-section      |                         |                        |
| - Mean         | 1190.3 (917.6)          | 536.1 (270.7)          |
| - Median (IQR) | 987.3 (734.3, 1319.3)   | 536.6 (289, 708.5)     |
